# Supplementary material for: Identifying myocardial injuries in “normal-appearing” myocardium in pediatric patients with clinically suspected myocarditis using mapping techniques
Source: PeerJ. 2020 Nov 4;8:e10252. doi: 10.7717/peerj.10252 (PMC7648451; doi:10.7717/peerj.10252)
Supplement: Supplemental Information 1 — The cardiac magnetic resonance of normal control, acute myocarditis and subacute/chronic myocarditis in pediatric patients. Baseline characteristics, cardiac function parameters, T1 and T2 mapping values in three groups. Group 1: normal control; Group 2: subacute/chronic myocarditis; Group 3: acute myocarditis. [file peerj-08-10252-s001.xlsx]

## Sheet: raw data 
GROUP	SEX	AGE	HCT	BSA	HR	EDV	ESV	LVM	SV	LVEF	HLA PRE	POST	ECV1	T2 HLA	SAPRE	POST	ECV1	T2SA
1	1	13	46.7	1.51	95	154.2	67.7	98.5	86.5	56.1	1344.8	843.3	25.2	39.5	1286.5	851.7	22	37.1
1	2	11	40.5	1.39	80	91	38.3	58.5	52.7	57.9	1305	745.2	29.5		1284.4	736.9	29.1
1	2	11	43.5	1.46	117	74.3	24.2	86.7	50.1	67.5	1365.9	927.6	30.2	36.6	1353.5	938.1	28.4	37
1	2	7	40.4	1.08	66	108.8	53.6	46.4	55.2	50.7	1279.5	798.4	29.3		1262.9	789.6	29.7	37.5
1	1	9	40.6	1.15	85	83.9	29.2	54.9	54.7	65.2	1324.9	790.7	28.1	34.3	1348.9	794.9	29.1	35.8
1	1	9	39	1.18	101	74	28	56.7	46	62.2	1301.7	807	30.2	37.3	1307.9	819.7	30.1	39.3
1	1	12	41.1	1.25	77	101.5	38.5	60.1	63	62.1	1336.9	741.7	29.3		1281.7	732.6	28	36.9
1	1	12	42	1.47	55	158.1	52.8	71.7	105.3	66.6	1339.5	778	28		1295.83	783.933	26.5
1	1	10	40.6	1.65	94	110.8	49.1	69.9	61.7	55.7	1307.8	715.8	28.9	35.7	1269.93	745.8	26.3	37.1667
1	1	13	40.1	1.61	69	134.3	59.3	97.4	75.1	55.9	1323	783.1	27.1	37.3	1297.37	781.167	26.3	36.6667
1	1	13	39.1	1.75	82	140.4	53.7	115.9	86.7	61.7	1282.6	646	24.3		1284.2	674.2	22.8
1	2	6	40.4	1.045	87	80.4	30.2	45.6	50.2	62.5	1384.7	791.3	29.3	37.6	1297.7	834.7	24.3	37.4
1	2	7	39	1.25	80	96.8	41.8	52.4	55.1	56.9	1323.9	741.4	29.2		1316.5	762.9	28.3
1	1	8	41.6	1.35	92	88.3	29.1	58	59.2	67.1	1269.1	746.2	28.6	37.7	1240.87	743.8	26.4	36.9333
1	2	13	40.9	1.65	79	96	30.3	53.9	65.7	68.4	1360.7	791.8	31.8	38.1	1335.3	825.1	28	37.3
2	1	6	37.7	0.87	77	68.6	30.8	35.4	37.8	55.1					1368	744.3	32.4
2	1	13	45.4	1.325	108	97.2	38.2	63.9	59.1	60.8	1263.3	639.5	24.2	35.1	1303	650.3	26.1	36.5
2	2	6	38.7	1.3	84	111.4	54.2	46.7	57.2	51.3	1311.8	702.5	29.2	38	1351.05	709.55	30.5	36.3
2	1	8	38.2	1.225	95	96.9	34	56.9	62.9	64.9	1330.3	841.1	29	38.4	1329.67	830.633	30.4	36.2
2	1	5	35.4	0.695	90	55.5	27.3	31.6	28.2	50.8					1402.8	651.4	37.2	36.5
2	1	8	38.9	1.15	83	90.8	40	74.6	50.8	55.9	1286.8	664.6	26.7	37	1283.17	647.467	28.7	37.6
2	2	6	40	0.8	113	53.9	18.7	40.3	35.2	65.3	1314	624.8	34.2		1270.2	663.4	28.8	37.1
2	1	6	41.8	1.025	90	82.2	31.6	44.6	50.6	61.5				36.8	1351.27	798.933	28.2	38.7
2	1	3	34.9	0.695	88	67.5	22	29.4	45.5	67.4	1316.5	724.3	37.4		1300.25	782.3	29.2	37
2	1	6	35.3	1.15	106	79.7	29.5	32.8	50.1	62.9	1325.8	779.5	28.4		1270.17	750.8	30	37.8
2	1	12	36	1.8	59	128.1	66	79.7	62.1	48.5	1292.4	601.5	29.2	37.8	1299.17	591.333	29.3	37.1
3	1	8	41.2	1.54	99	84.1	33.9	63.5	50.2	60				34.6	1310.9	750.833	25.1	34.4
3	2	9	38.4	1.2	96	99.2	40.4	74.2	58.9	59.3	1331	766.1	27.2	35.9	1331.77	757.1	27.7	36.1
3	1	6	36.1	0.975	75	90.3	42.2	46.4	48.1	53.3	1264.8	804	28.4	34.8	1307.77	811.333	31.2	35.0667
3	1	13	46.2	1.49	80	110.9	50	79.4	61.2	55.2	1309.4	743.8	27	35	1289.87	747.567	26.3	36.4333
3	1	7	41.9	1.095	86	70	24.9	56.1	44.9	64.3	1413.3	785.7	32.1		1293.25	784.4	29.3	37.5
3	1	14	45.9	1.75	62	182.5	84.6	87.9	97.9	53.6	1348.7				1306.2	781	28.1	37.3
3	2	2	33.2	0.485	114	36.2	12	23.3	24.3	66.9				41.1	1355	745.5	27.7	39.95
3	1	10	38.7	1.49	95	95.9	36.2	64.2	59.7	62.3				36.7	1332.43	704.933	28.2	37.15
3	1	9	39.9	1.15	91	81.4	31.7	63	49.8	61.1	1296	695.2	24.7		1342.7	683.8	26.3
3	1	10	40.4	1.31	119	82.3	34.8	64.2	47.5	57.7	1325.2	748.2	32.5	37.4	1295.55	770.9	28.1	35.75
3	1	6	32.8	0.975	99	50.7	21	46.73	30	58.7				38.5	1405.25	704.8	30.7	42.8
3	2	8	39.1	1.2	115	70.9	25.8	44.4	45.1	63.6	1412.9	746.1	34.6	38.3	1411	745.8	34.5	40
3	2	5	42.8	0.835	107	66.1	23.6	33.2	42.5	64.3	1400.9	764.1	28.4	38.5	1362.4	749	29.1	40.05
3	2	8	38	0.975	82	88.5	37.2	31.9	51.3	57.9	1312.1	611.6	28.3	34.4	1351.23	608.567	29.3	36.7
3	2	9	35.7	1.165	67	122.1	59.6	58.9	62.5	51.2	1335.9	657.5	30	36.2	1333.8	650.45	29.1	35.6667
3	2	9	37.3	1.2	92	85.4	40.1	46.9	45.3	53.1	1290.2	783.6	27.2		1299	795.467	27.4
3	2	12	43.9	1.71	97	111	38.1	85.9	72.9	65.7	1348.8	642.6	26.4	37.4	1335.27	650.233	26.3	37.4667
3	2	12	42.9	1.2	79	90.9	32.2	44.3	58.6	64.5	1377.4	621	25.1	36	1313.2	620.233	25	35.7333
3	2	12	40.5	1.8	88	109.5	37.6	105.3	71.9	65.7	1277.9	650	25.2	36.6	1274.73	646.1	25.9	36
3	1	10	39.5	1.42	79	115.2	43	88.4	72.2	62.7	1332.1	755.2	29.9	36.3	1316.6	769.7	27.3	39.2
